# Supplementary material for: Green synthesis of titania nanowire composites on natural cellulose fibers
Source: Royal Society of Chemistry journal article supplement (doi:10.1039/b609887h), 2006-10-14
Supplement: b609887h.pdf [file b609887h.pdf]

## **Supporting Information**

### **Green synthesis of titania nanowire composites on natural cellulose fibers**

**Natarajan Sathiyamoorthy Venkataramanan, Keitaro Matsui, Hajime Kawanami  
and Yutaka Ikushima**

*Research Center for Compact Chemical Process, National Institute of Advanced  
Industrial Science and Technology(AIST), 4-2-1, Nigatake, Miyagino-ku, Sendai 983-  
8551, Japan*

Experimental Procedure:

To a 5 ml of 1-butyl-3-methylimidazolium chloride ([C<sub>4</sub>mim]Cl) was added 0.5 mg of cellulose sheet (Adventec, Japan) and allowed to dissolve at room temperature by stirring at 600 rpm. To the above dissolved cellulose was added 0.5 mg Titanium(IV) n-butoxide (Aldrich Purity > 97%) over a 30 min period of time. Stirring was ensured for uniform coating of TiO<sub>2</sub> over cellulose. After 1 hour, 20 ml of Ethanol was added drop wise, while stirring was continued. The Ionic liquids and the unreacted metal alkoxide were removed by centrifuging the above mixture. Complete removal of ILs was done by washing the TiO<sub>2</sub> composite for several times. Finally, the material was dried in flowing air at ambient temperature. The EDX spectra of the material has an approximate atomic ratio of 2 : 1.5 : 1 for C : O : Ti respectively.

Figures Captions:

Figure S1: XRD spectra of TiO<sub>2</sub> cellulose fiber and after calcination at 500° C for 2 h

Figure S2: EDX spectra of TiO<sub>2</sub>/cellulose fiber

Figure S3: EDX spectra of TiO<sub>2</sub>/cellulose fiber after calcination at 500<sup>0</sup>C for 2 h

Figure S4: Reflectance spectra of the calcined TiO<sub>2</sub>/cellulose fiber

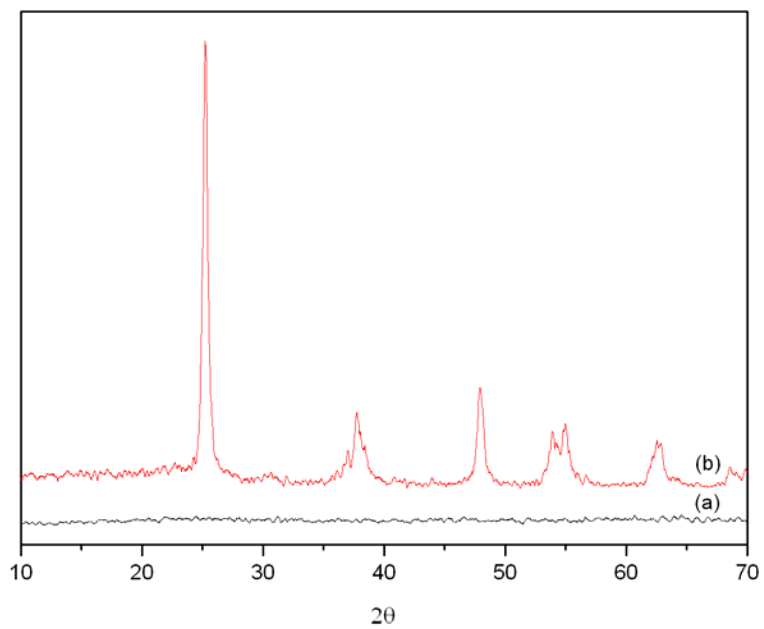

Figure S1

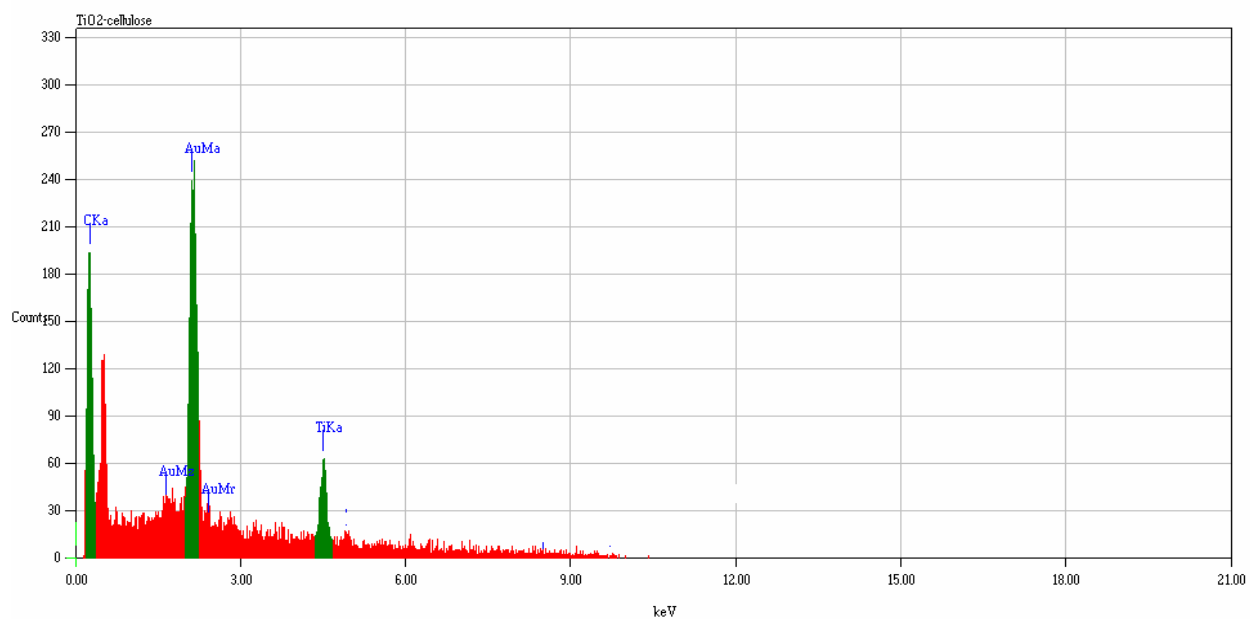

Figure S2

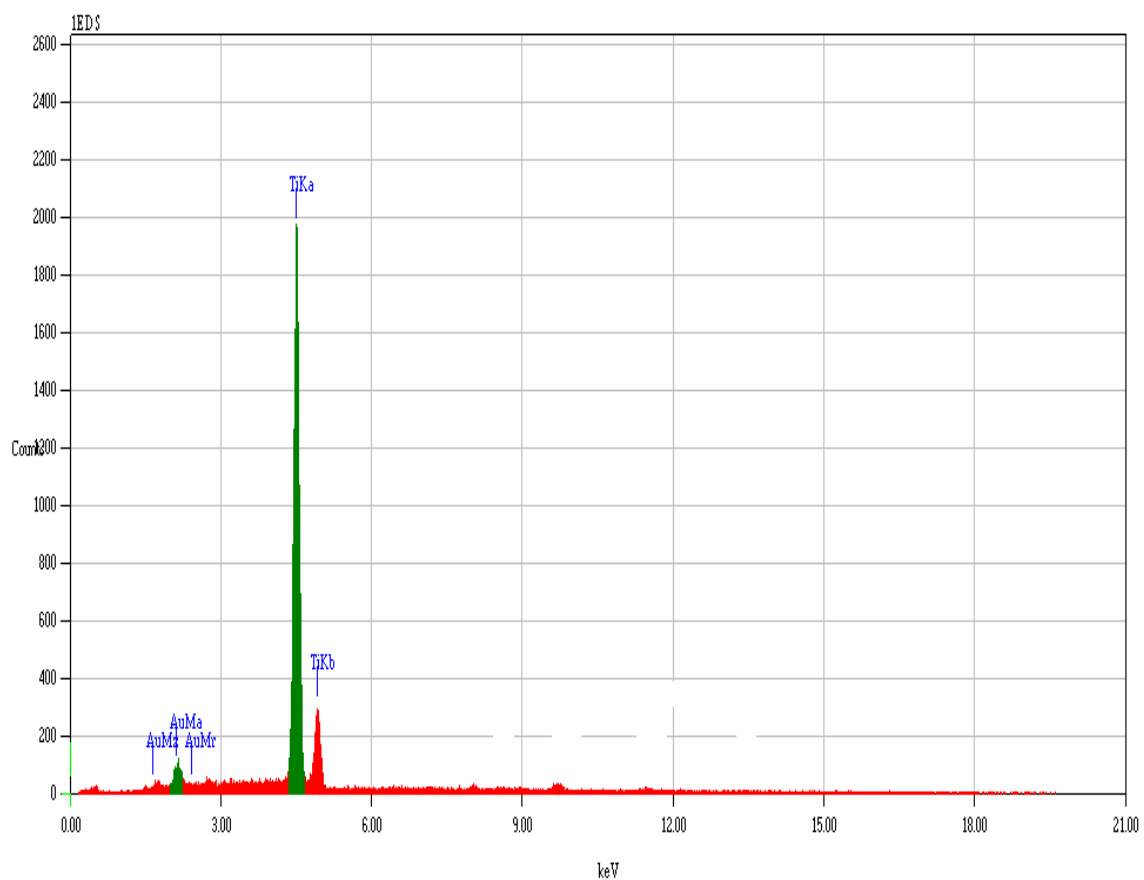

Figure S3

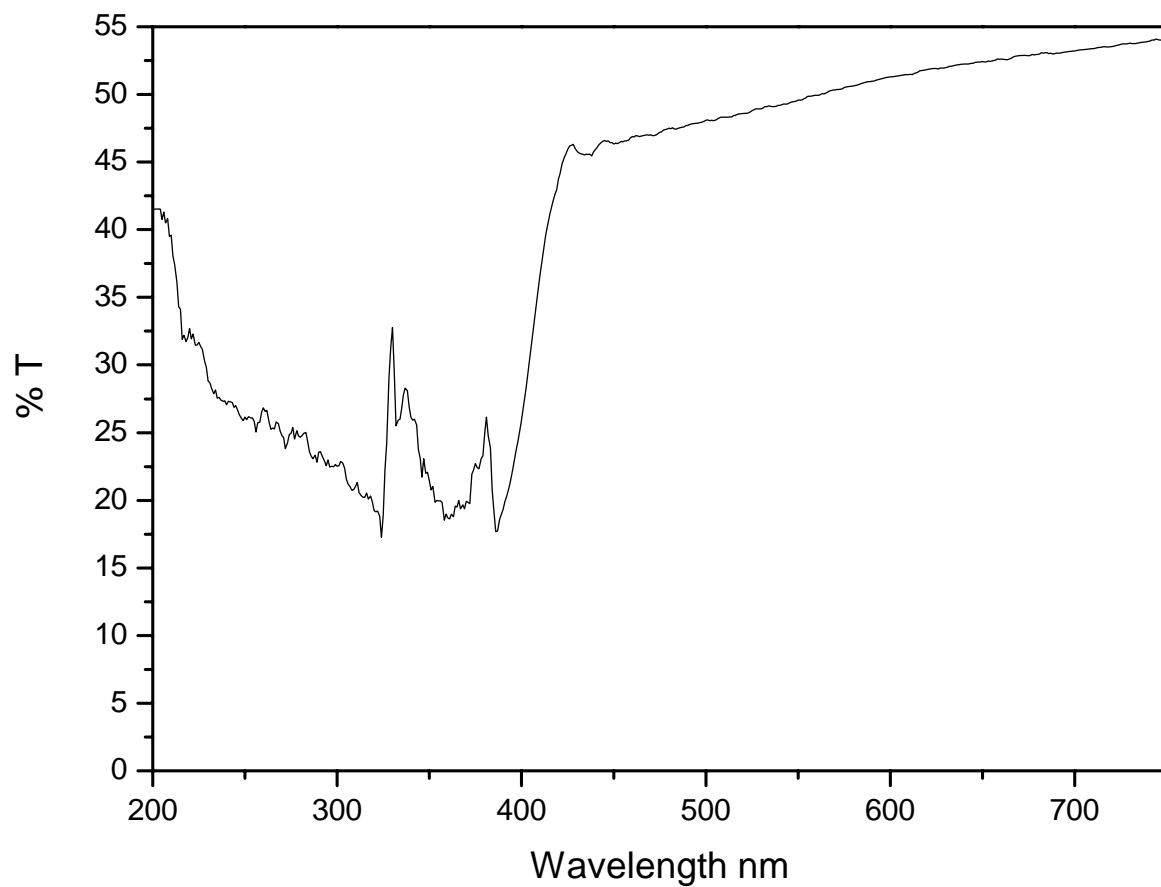

**Figure S4**
